# Supplementary material
Source: Research Square preprint supplement (doi:10.21203/rs.3.rs-9783060/v1)
Supplement: Supplementary file 1 [file 322608014096c407cb879950.pdf]

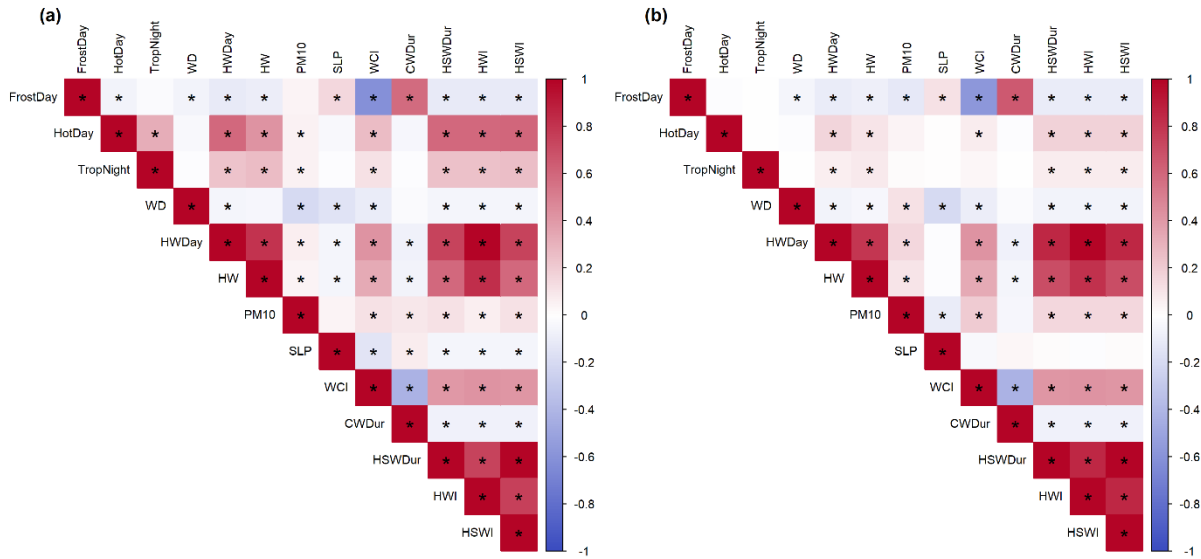

Figure S1. Correlation matrices of HBC-region 2.2 and 4.1 for all atmospheric and air pollution factors (part of the predictor sets for non-ST elevation myocardial infarction (NSTEMI) and tachycardia), using the Spearman Rank Correlation Coefficient, \* = marking significant correlations ( $p \leq 0.05$ ), (a) HBC-region 2.2, (b) HBC-region 4.1

Table S1. Definition of Cardiovascular Diseases according to the International Statistical Classification of Diseases and Related Health Problems, 10<sup>th</sup> revision, German Modification (ICD-10-GM) and the Intensive Care Unit (ICU) criterion

| Disease                        | ICD-10-GM code                                                                                                     | ICU criterion*                     |
|--------------------------------|--------------------------------------------------------------------------------------------------------------------|------------------------------------|
| Myocardial infarction (NSTEMI) | 1: I21.4, I21.9, I20.0                                                                                             | 1: Independent of ICU              |
|                                | 2: I20.1, I20.8, I20.9, I25.6, I25.8, I25.9                                                                        | 2: ICU                             |
|                                | 3: I25.11, I25.12, I25.13, I25.14, I25.15, I25.16                                                                  | 3: ICU exclusive OPS code of 5-361 |
| Tachycardia                    | I47.0, I47.1, I47.2, I47.9, I48.00, I48.01, I48.10, I48.11, I47.0, I47.1, I47.2, I47.9, I48.0, I48.2, I48.3, I48.4 | ICU                                |

\*Definition of ICU according to OPS codes and specialist department codes [19]

Table S2. Regression estimates of multivariable generalized additive models for non-ST elevation myocardial infarction (NSTEMI) and tachycardia for females and males in HBC-region 2.2 and 4.1, focusing on atmospheric pressure

| Disease     | Sex    | HBC-region | Regression estimate | p-value  |
|-------------|--------|------------|---------------------|----------|
| Tachycardia | Female | 2.2        | EDF* = 0.885        | 0.004    |
| Tachycardia | Male   | 2.2        | EDF = 0.855         | 0.008    |
| NSTEMI      | Female | 2.2        | $\beta = -0.002$    | < 0.0001 |
| NSTEMI      | Male   | 2.2        | EDF = 0.941         | 0.0005   |
| NSTEMI      | Female | 4.1        | EDF = 0.873         | 0.006    |
| NSTEMI      | Male   | 4.1        | EDF = 0.806         | 0.023    |
| Tachycardia | Female | 4.1        | EDF = 0.706         | 0.056    |
| Tachycardia | Male   | 4.1        | EDF = 0.877         | 0.005    |

\*EDF = effective degree of freedom

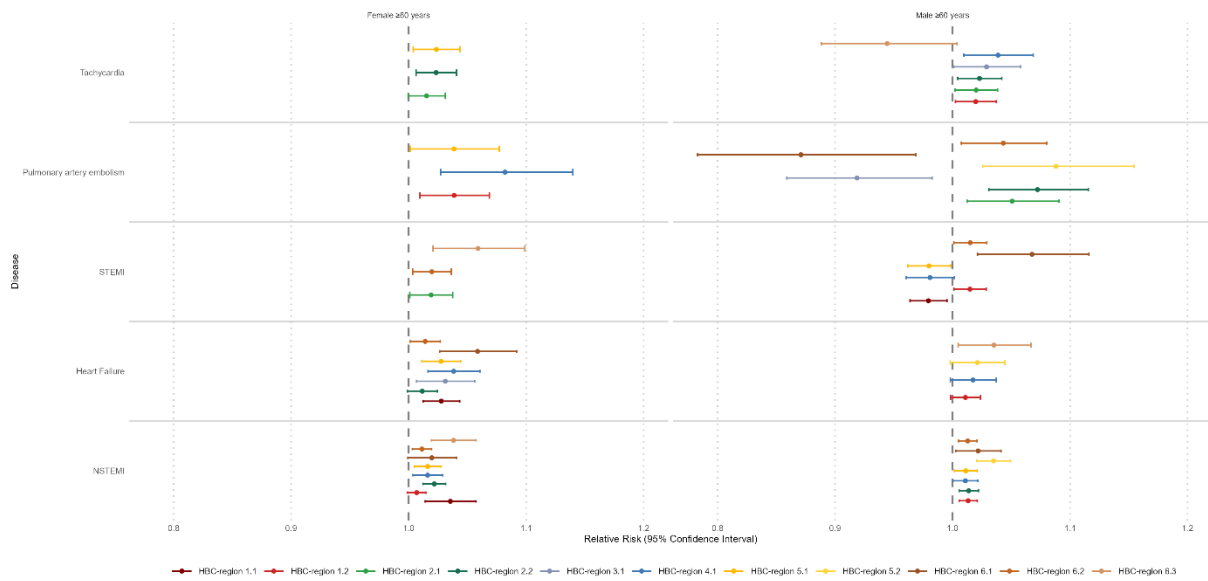

Figure S2. Forest plot of all cardiovascular entities showing Relative Risk and 95% Confidence Interval for significant associations ( $p \leq 0.05$ ) per HBC-region due to a 10hPa atmospheric pressure drop (1016.1hPa to 1006.1hPa)

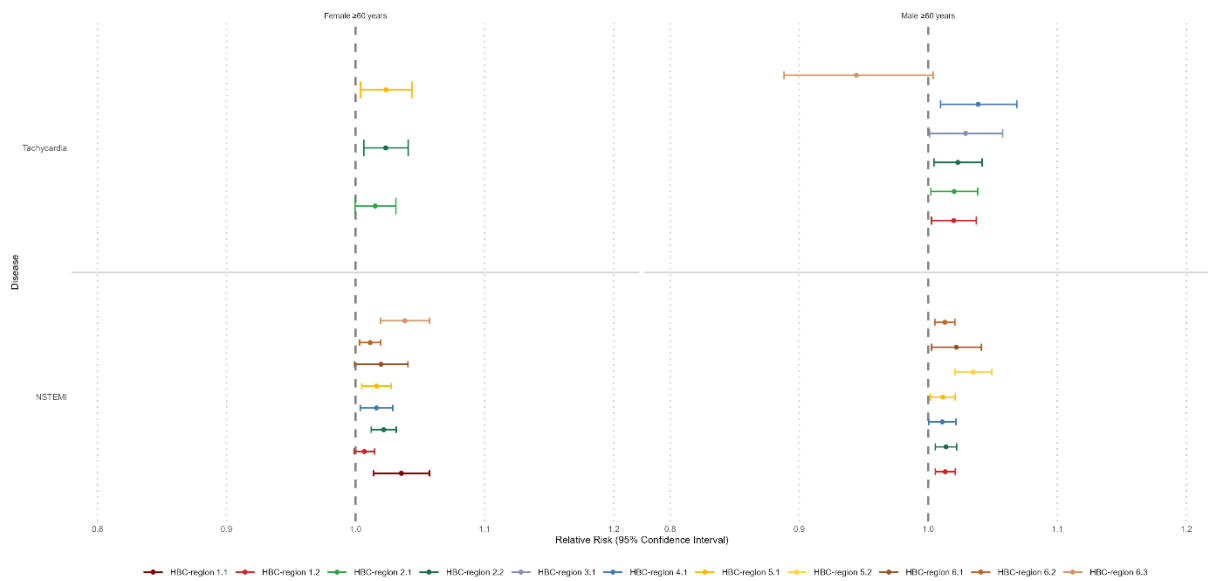

Figure S3. Forest plot of Non-ST elevation myocardial infarction (NSTEMI) and tachycardia showing Relative Risk and 95% Confidence Interval for significant associations ( $p \leq 0.05$ ) per HBC-region due to a 10hPa atmospheric pressure drop (1016.1hPa to 1006.1hPa)

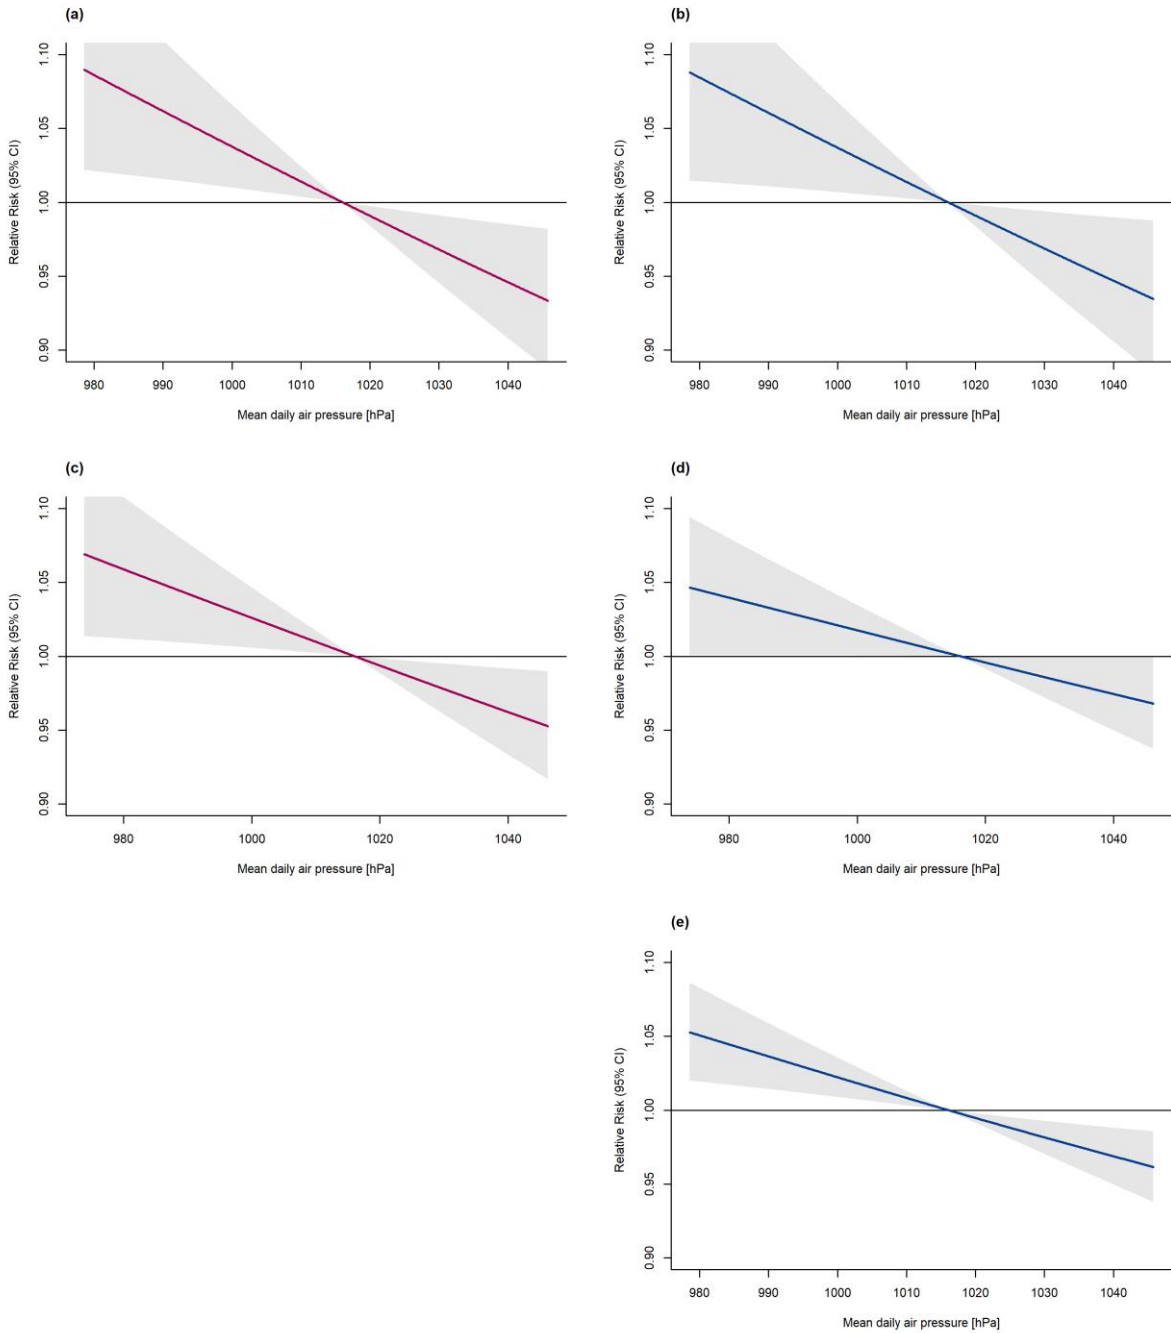

Figure S4. Exposure-response curve of daily atmospheric pressure (non-linear model predictors), (a) Women with tachycardia in HBC-region 2.2, (b) Men with tachycardia in HBC-region 2.2, (c) Women with non-ST elevation myocardial infarction (NSTEMI) in HBC-region 4.1, (d) Men with NSTEMI in HBC-region 4.1, (e) Men with NSTEMI in HBC-region 2.2
